# Supplementary material
Source: PubMed Central journal article supplement (PMC3408216)
Supplement: NIHMS228108-supplement-1_si_001.pdf [file NIHMS228108-supplement-1_si_001.pdf]

*Supporting Information*

Time course of congener uptake and elimination in  
rats after short-term inhalation exposure to an  
airborne polychlorinated biphenyl (PCB) mixture

*Xin Hu<sup>1</sup>, Andrea Adamcakova-Dodd<sup>2</sup>, Hans-Joachim Lehmler<sup>1,2</sup>, Dingfei Hu<sup>3</sup>, Izabela Kania-Korwel<sup>2</sup>, Keri C Hornbuckle<sup>1,2,3</sup>, Peter S Thorne\*<sup>1,2,3</sup>*

From Interdisciplinary Graduate Program in Human Toxicology<sup>1</sup>, Department of Occupational and Environmental Health<sup>2</sup> and Department of Civil and Environmental Engineering<sup>3</sup>, University of Iowa, Iowa City, Iowa 52242

**Corresponding Author:**

Peter S. Thorne, Ph.D.

University of Iowa

100 University Research Park, IREH

Iowa City, Iowa 52242-5000 USA

TEL: (319)335-4216

FAX: (319) 335-4006

[peter-thorne@uiowa.edu](mailto:peter-thorne@uiowa.edu)

## **Table of Content**

### **Chemicals**

### **Extraction and clean-up procedure**

### **Volatilization model**

### **Quality assurance / quality control**

**Table S1.** Method detection limits (MDL) for all PCB congeners.

**Table S2.** Recovery rate of spiked surrogate standards during the PCB extraction process from rat liver, lung, blood, adipose tissue and brain after exposure to Aroclor 1242 vapor mixture.

**Table S3.** Recovery rate of spiked ongoing precision and recovery standards during the PCB extraction process from rat blood and tissue after exposure to Aroclor 1242 vapor mixture.

### **Congener uptake and toxicological response in rats after 10-day nose-only exposure**

**Table S4.** Lipid-adjusted mass of prevailing PCB congeners found in rat tissues.

**Table S5.** Total cell counts and differential cell counts, levels of total protein and LDH activity BAL fluid from rats subacutely exposed to Aroclor 1242 vapor.

**Table S6.** Concentration of cytokines in BAL fluid from rats subacutely exposed to Aroclor 1242 vapor.

**Figure S1.** Effect of PCBs on body weight gain in rats during 10 d subacute inhalation exposure to Aroclor 1242 vapor.

### **Biological half lives**

**Table S7** Biological half lives of detected congeners in rat liver, lung, blood, adipose tissue and brain after acute exposure to PCB vapor mixture from Aroclor 1242.

### **Time course of individual PCB congener levels in rat tissue**

**Figure S2** Comparison of time course of concentration change for PCBs 8, 15, 31, 20+28, 52 and 66 after nose-only inhalation to Aroclor 1242 vapor mixture

**Figure S3-S30** Time course of concentration change in liver, lung, blood, adipose tissue and brain after acute nose-only inhalation to Aroclor 1242 vapor mixture.

### **Literature Cited**

**Chemicals.** IUPAC identities, numbered PCB 1 (monochlorobiphenyl) through PCB 209 (decachlorobiphenyl) are used in this document for congener identification (1). Florisil (60-100 mesh), dimethylsulfoxide (anhydrous, 99.9%), sodium sulfite, sulfuric acid (concentrated) and pesticide grade solvents were purchased from Fisher Sci. (Pittsburgh, PA, US). Tetrabutylammonium hydrogen sulfate was purchased from JT Baker (Phillipsburg, NJ, US). Diatomaceous earth was obtained from Dionex (Sunnyvale, CA, US). 3,5-dichlorobiphenyl (PCB 14) and 2,2',3,4,4',5,6,6'-octachlorobiphenyl (PCB 204) were purchased from Cambridge Isotope Laboratories, Inc. (Andover, MA). Deuterium labeled 2,3,5,6-tetrachlorobiphenyl (d-PCB 65) was purchased from CDN isotopes (Quebec, Canada). Ongoing precision and recovery (OPR) standard was purchased as a ready mixture (WHO / NIST/ NOAA congener list) from AccuStandard (New Haven, CT). PCB 3 was synthesized in the laboratory (with a purity of >99%, based on the relative peak) and added to the AccuStandard mixture to represent lower chlorinated PCBs. After dilution it contained 410 ng/mL of PCB 3 and 380 ng/mL each of the following in isooctane: PCBs 8, 18, 28, 44, 52, 66, 77, 81, 101, 105, 114, 118, 123, 126, 128, 137, 153, 156, 157, 167, 169, 170, 180, 187, 189, 195, 206, and 209. For the OPR spike, 250  $\mu$ L was added for each set of samples.

**Extraction and clean-up procedure.** The extraction of PCBs was performed by pressurized liquid extraction (PLE) as described elsewhere (2, 3). Briefly, after pre-extraction of PLE cells containing Florisil and diatomaceous earth, tissue samples were thoroughly homogenized into diatomaceous earth and divided to two halves for PCB analysis (Fraction A) and for lipid extraction (Fraction B). Fraction A was placed on top of Florisil in PLE cells and spiked with surrogate standards. The cells were then extracted with hexane-acetone (1:1 v/v) at 120 °C, 1500 psi and one static cycle of 5 min. After concentrating the extract to 1 mL, sulfur impurities were removed by mixing 2-propanol and tetrabutylammonium sulfite, and adding nanopure water afterwards. The organic layer was then mixed with concentrated sulfuric acid and transferred to vials after overnight standing. Fraction B was extracted using chloroform-methoanol (2:1 v/v) at 120 °C and 1500 psi. The total lipid content was determined gravimetrically after evaporation of solvents to dryness.

**Volatilization model.** A model was established to predict the theoretical concentration and distribution profile of the vapor mixture generated from volatilization. The solution of Aroclor 1242 used for generation of airborne PCBs was analyzed. The mass fraction of the solution was used as an input to the volatilization model. The atmospheric concentration of each individual congener was assumed to be in equilibrium with the concentration in the solution. Vapor pressures for each congener were obtained from previously reported equations (5, 6). Partial pressure for each congener was calculated based on Raoult's Law:

$$P_i = X_i \times V_{P_L}$$

Where

$P_i$  = Partial pressure, atm;  $X_i$  = Molar fraction of the congener in the solution;  $V_{P_L}$  = Vapor pressure of the congener.

The atmospheric concentration was calculated based on the Ideal Gas Law:

$$C_i = \frac{Mass (g)}{V(L)} = \frac{P_i(atm) \times M.W. (\frac{g}{mole})}{R(\frac{L \cdot atm}{K \cdot moles}) \times T(K)}$$

Where  $C_i$  = Estimated atmospheric concentration for the congener;  $M.W.$  = Molecular weight of the congener;  $R$  = Ideal gas constant;  $T$  = Temperature.

The total amount of PCBs that the animals were exposed to is:

$$\sum PCB \left( \frac{mg}{m^3} \right) = \frac{\sum_{i=1}^{209} C_i \left( \frac{mg}{m^3} \right) \times Q_{PCB} \left( \frac{L}{min} \right)}{Q_{total} \left( \frac{L}{min} \right)}$$

Where

$Q_{PCB}$  = The flow rate passed over the solution;  $Q_{total}$  = The flow rate passed through the animal exposure chamber.

The mass percentage of each congener in the vapor mixture was calculated to determine the profile distribution:

$$\text{Mass Percentage}_i = \frac{C_{air} \left( \frac{mg}{m^3} \right)}{\sum_{i=1}^{209} C_i \left( \frac{mg}{m^3} \right)}$$

**Quality assurance / quality control measures.** The quality of the analytical method was assessed by the method blank samples, the recovery of ongoing precision and recovery standard, and measurements of standard reference materials. Every sample was spiked with surrogates and each PCB mass was corrected for recovery. The method detection limit (MDL) was calculated from blank samples analyzed in parallel to all tissue and blood samples according to EPA formula:

$$MDL = t_{n-1} \times SD + \bar{x}$$

where  $\bar{x}$  = the mean of replicates of blank measures,  $t_{n-1}$  is Student's t-value for (n-1) degrees of freedom at 99% confidence level, and SD is standard deviation of the replicates. Standard Reference Material 1944, New York, New Jersey Waterway sediment (SRM 1944, National Institutes of Standards and Testing) was analyzed and recently reported (4), with an acceptable quantification results with respect to the certified values (mean difference between the measured and certified values was  $15 \pm 15\%$ ).



**Table S1.** Method detection limits (MDL) for all PCB congeners determined from blank samples analyzed in parallel with tissue and blood samples. Values are expressed in ng.<sup>a</sup>

| PCB      | MDL  | PCB                  | MDL  | PCB         | MDL  | PCB     | MDL  |
|----------|------|----------------------|------|-------------|------|---------|------|
| 1        | --   | 51                   | 0.41 | 106         | 0.74 | 162     | --   |
| 2        | --   | 52                   | 0.34 | 107/124     | --   | 164     | --   |
| 3        | --   | 54                   | 0.10 | 108         | --   | 165     | --   |
| 4        | 0.23 | 55                   | 0.38 | 110/115     | 0.46 | 167     | 0.38 |
| 5        | 0.20 | 56                   | 0.37 | 111         | 0.08 | 169     | 0.13 |
| 6        | 0.13 | 57                   | 0.38 | 112         | 0.36 | 170     | 0.05 |
| 7        | --   | 58                   | 0.56 | 114         | 0.31 | 171/173 | 0.08 |
| 8        | 0.14 | 59                   | --   | 118         | 0.17 | 172     | 0.13 |
| 9        | --   | 60                   | --   | 120         | 0.13 | 174     | --   |
| 10       | --   | 61/70/74/76          | 0.71 | 121         | --   | 175     | --   |
| 11       | 0.04 | 62/75                | 0.09 | 122         | 0.28 | 176     | --   |
| 12/13    | 0.06 | 63                   | 2.58 | 123         | 0.65 | 177     | --   |
| 15       | --   | 64                   | 0.15 | 126         | 0.13 | 178     | --   |
| 16       | 0.41 | 66                   | 0.81 | 127         | --   | 179     | 0.13 |
| 17       | 1.83 | 67                   | --   | 129/138/163 | 0.08 | 180/193 | 0.18 |
| 18/30    | 2.27 | 68                   | 0.31 | 130         | --   | 181     | 0.08 |
| 19       | --   | 72                   | 0.53 | 131         | 0.67 | 182     | --   |
| 20/28    | 0.41 | 73                   | 0.31 | 132         | 0.63 | 183     | 0.03 |
| 21/33    | 0.41 | 77                   | 0.48 | 133         | 0.21 | 184     | --   |
| 22       | 0.88 | 78                   | 0.17 | 134/143     | 0.37 | 185     | 0.03 |
| 23       | --   | 79                   | 0.51 | 135/151     | --   | 186     | --   |
| 24       | 0.14 | 80                   | --   | 136         | 0.28 | 187     | 0.16 |
| 25       | --   | 81                   | 0.29 | 137         | --   | 188     | --   |
| 26/29    | 0.18 | 82                   | 0.30 | 139/140     | --   | 189     | 0.13 |
| 27       | 0.06 | 83                   | 0.59 | 141         | --   | 190     | --   |
| 31       | 1.14 | 84                   | 0.08 | 142         | 0.78 | 191     | --   |
| 32       | 0.54 | 85/116/117           | 0.38 | 144         | --   | 192     | --   |
| 34       | --   | 86/87/97/109/119/125 | 0.21 | 145         | --   | 194     | --   |
| 35       | 0.04 | 88/91                | 0.14 | 146         | --   | 195     | --   |
| 36       | 0.34 | 89                   | --   | 147/149     | 0.70 | 196     | --   |
| 37       | 0.51 | 90/101/113           | 0.97 | 148         | --   | 197     | 0.53 |
| 38       | --   | 92                   | --   | 150         | 0.03 | 198/199 | 0.17 |
| 39       | --   | 93/100               | --   | 152         | 0.05 | 200     | --   |
| 40/41/71 | 0.17 | 94                   | --   | 153/168     | 0.31 | 201     | --   |
| 42       | 0.89 | 95                   | 0.56 | 154         | 0.40 | 202     | 0.66 |
| 43       | 0.78 | 96                   | 0.09 | 155         | 0.05 | 203     | --   |
| 45       | 0.50 | 98/102               | 0.29 | 156/157     | 0.18 | 205     | --   |
| 46       | 0.18 | 99                   | 0.36 | 158         | --   | 206     | 0.14 |
| 48       | 0.20 | 103                  | --   | 159         | --   | 207     | 0.08 |
| 49/69    | 0.52 | 104                  | --   | 160         | 0.10 | 208     | --   |
| 50/53    | --   | 105                  | 0.23 | 161         | --   | 209     | 0.13 |

<sup>a</sup>All samples were injected from a final volume of 100 µL. -- indicates that MDL ≤ 0.02 ng.

**Table S2.** Recovery rate of spiked surrogate standards during PCB extraction process from rat liver, lung, blood, adipose tissue and brain after exposure to Aroclor 1242 vapor mixture. Values are expressed as mean  $\pm$  standard deviation. Surrogates are injected into every sample and each PCB mass is corrected for recovery.

|                       | Liver        | Lung         | Blood        | Adipose      | Brain        |
|-----------------------|--------------|--------------|--------------|--------------|--------------|
| PCB 14 <sup>a</sup>   | 77 $\pm$ 24% | 66 $\pm$ 30% | 86 $\pm$ 25% | --           | --           |
| d-PCB 65 <sup>a</sup> | 86 $\pm$ 34% | 82 $\pm$ 37% | 87 $\pm$ 17% | --           | --           |
| PCB 14 <sup>b</sup>   | 30 $\pm$ 8%  | 20 $\pm$ 7%  | 31 $\pm$ 6%  | 21 $\pm$ 13% | 40 $\pm$ 10% |
| d-PCB 65 <sup>b</sup> | 41 $\pm$ 8%  | 29 $\pm$ 9%  | 60 $\pm$ 8%  | 38 $\pm$ 21% | 53 $\pm$ 10% |

<sup>a</sup>Ten-day subacute exposure to Aroclor 1242 vapor mixture, n=22 (number of samples).

<sup>b</sup>Two-hour acute exposure to Aroclor 1242 vapor mixture, n=27 (number of samples).

**Table S3.** Recovery rate of spiked ongoing precision and recovery standards during PCB extraction process from rat blood and tissue after exposure to Aroclor 1242 vapor mixture. Values are corrected for surrogate recovery, expressed as mean recovery rate and standard deviation (SD).

| Congener | Average <sup>a</sup> | SD <sup>a</sup> | Average <sup>b</sup> | SD <sup>b</sup> |
|----------|----------------------|-----------------|----------------------|-----------------|
| 3        | 46.15%               | 17.45%          | 72.24%               | 21.30%          |
| 8        | 95.96%               | 2.57%           | 91.06%               | 18.84%          |
| 18       | 81.86%               | 38.69%          | 106.85%              | 21.15%          |
| 28       | 96.79%               | 28.04%          | 103.00%              | 14.38%          |
| 44       | 80.23%               | 15.43%          | 82.52%               | 18.10%          |
| 52       | 88.09%               | 8.42%           | 103.18%              | 8.54%           |
| 66       | 85.63%               | 0.33%           | 104.24%              | 10.68%          |
| 77       | 73.52%               | 10.83%          | 103.14%              | 20.51%          |
| 81       | 77.60%               | 7.81%           | 105.17%              | 14.13%          |
| 101      | 71.62%               | 2.81%           | 108.87%              | 12.62%          |
| 105      | 68.18%               | 7.96%           | 107.21%              | 20.02%          |
| 114      | 70.63%               | 7.37%           | 102.96%              | 16.00%          |
| 118      | 69.75%               | 7.49%           | 103.28%              | 16.53%          |
| 123      | 69.02%               | 6.94%           | 104.91%              | 17.70%          |
| 126      | 59.28%               | 9.98%           | 116.99%              | 51.59%          |
| 128      | 66.93%               | 14.20%          | 106.61%              | 20.27%          |
| 137      | 68.96%               | 15.60%          | 107.93%              | 23.92%          |
| 153      | 70.44%               | 13.25%          | 109.57%              | 20.72%          |
| 156+157  | 63.83%               | 19.98%          | 106.66%              | 28.66%          |
| 167      | 69.72%               | 19.95%          | 108.86%              | 49.68%          |
| 169      | 69.34%               | 20.77%          | 114.36%              | 38.02%          |
| 170      | 70.91%               | 21.00%          | 102.32%              | 24.37%          |
| 180      | 70.50%               | 24.46%          | 103.49%              | 29.96%          |
| 187      | 71.10%               | 18.06%          | 108.97%              | 22.35%          |
| 189      | 86.85%               | 34.48%          | 110.76%              | 39.62%          |
| 195      | 85.43%               | 32.27%          | 99.97%               | 42.30%          |
| 206      | 93.09%               | 36.68%          | 114.27%              | 49.15%          |
| 209      | 94.35%               | 38.02%          | 112.69%              | 50.99%          |

<sup>a</sup>Ten-day subacute exposure to Aroclor 1242 vapor mixture, n=2 (number of sample sets).

<sup>b</sup>Two-hour acute exposure to Aroclor 1242 vapor mixture, n=6 (number of sample sets).

**Table S4.** Lipid-adjusted mass of prevailing PCB congeners found in rat tissues. Values are expressed as ng/g lipid weight and mass percentage of total PCB amount for each congener. Data shown are the mean of N=7 rats from the 10-day Aroclor 1242 vapor exposed group. Bold indicates PCB mass percentage over 2% in any tissue.

| Tissue                 |       | Liver         |              | Lung          |              | Blood         |              |
|------------------------|-------|---------------|--------------|---------------|--------------|---------------|--------------|
| Congener               |       | [ng/g         | % of         | [ng/g         | % of         | [ng/g         | % of         |
|                        |       | lipid weight] | total        | lipid weight] | total        | lipid weight] | total        |
| 1                      | Mono  | 5.1           | 0.08         | 5.5           | 0.08         | 0.03          | 0.15         |
| 2                      |       | 3.6           | 0.05         | 1.4           | 0.02         |               |              |
| 3                      |       | 2.3           | 0.03         | 1.4           | 0.02         | 0.01          | 0.03         |
| 4                      | Di    | 25.8          | 0.39         | 54.2          | 0.81         | 0.03          | 0.20         |
| 8                      |       | 44.7          | 0.67         | 117.3         | 1.75         | 0.10          | 0.57         |
| 15                     |       | 12.0          | 0.18         | 12.3          | 0.18         | 0.03          | 0.14         |
| 16                     | Tri   | 10.7          | 0.16         | 37.2          | 0.55         | 0.03          | 0.15         |
| 17                     |       | 20.3          | 0.30         | 29.0          | 0.43         | 0.02          | 0.10         |
| <b>20/28*</b>          |       | <b>1387.7</b> | <b>20.77</b> | <b>2383.1</b> | <b>35.50</b> | <b>4.1</b>    | <b>22.88</b> |
| 21/33*                 |       | 49.2          | 0.74         | 89.4          | 1.33         | 0.06          | 0.34         |
| 31                     |       | 68.4          | 1.02         | 112.5         | 1.68         | 0.16          | 0.88         |
| 32                     |       | 15.7          | 0.24         | 28.2          | 0.42         | 0.03          | 0.15         |
| <b>49*/69</b>          | Tetra | <b>1160.9</b> | <b>17.37</b> | <b>146.1</b>  | <b>2.18</b>  | <b>2.1</b>    | <b>11.24</b> |
| <b>52</b>              |       | <b>158.1</b>  | <b>2.37</b>  | <b>158.6</b>  | <b>2.36</b>  | <b>0.5</b>    | <b>2.87</b>  |
| <b>60</b>              |       | <b>280.8</b>  | <b>4.20</b>  | <b>359.8</b>  | <b>5.36</b>  | <b>0.8</b>    | <b>4.72</b>  |
| <b>61/70*/74*/76</b>   |       | <b>403.4</b>  | <b>6.04</b>  | <b>542.5</b>  | <b>8.08</b>  | <b>1.4</b>    | <b>7.81</b>  |
| 64                     |       | 48.3          | 0.72         | 85.1          | 1.27         | 0.17          | 0.93         |
| <b>66</b>              |       | <b>703.0</b>  | <b>10.52</b> | <b>865.8</b>  | <b>12.90</b> | <b>2.4</b>    | <b>13.61</b> |
| 77                     |       | 14.3          | 0.21         |               |              | 0.01          | 0.05         |
| 82                     | Penta | 10.3          | 0.15         |               |              | 0.06          | 0.33         |
| <b>83*/99*/112</b>     |       | <b>965.4</b>  | <b>14.45</b> | <b>545.0</b>  | <b>8.12</b>  | <b>2.4</b>    | <b>13.31</b> |
| <b>85*/116/117</b>     |       | <b>235.9</b>  | <b>3.53</b>  | <b>82.6</b>   | <b>1.23</b>  | <b>0.3</b>    | <b>1.53</b>  |
| 86/87*/97*/109/119/125 |       | 56.6          | 0.85         | 45.6          | 0.68         | 0.2           | 0.98         |
| <b>90/101*/113</b>     |       | <b>165.0</b>  | <b>2.47</b>  | <b>120.8</b>  | <b>1.80</b>  | <b>0.40</b>   | <b>2.22</b>  |
| 95                     |       | 105.4         | 1.58         | 79.2          | 1.18         | 0.16          | 0.91         |
| <b>105</b>             |       | <b>119.8</b>  | <b>1.79</b>  | <b>104.6</b>  | <b>1.56</b>  | <b>0.5</b>    | <b>2.73</b>  |
| 110*/115               |       | 49.4          | 0.74         | 45.5          | 0.67         | 0.4           | 2.36         |
| <b>118</b>             |       | <b>190.4</b>  | <b>2.85</b>  | <b>240.5</b>  | <b>3.58</b>  | <b>0.8</b>    | <b>3.74</b>  |
| 129/138*/163           | Hexa  | 29.5          | 0.44         | 11.8          | 0.18         | 0.07          | 0.41         |
| 147/169                |       | 27.3          | 0.41         | 25.2          | 0.38         | 0.05          | 0.30         |
| 153*/168               |       | 25.0          | 0.37         | 27.4          | 0.41         | 0.04          | 0.21         |
| Total PCBs             |       | 6681.3        | 100.00       | 6714.2        | 100.00       | 18.0          | 100.00       |

\*Major congeners of the coeluting congener set in Aroclor 1242.

**Table S5.** Total cell counts and differential cell counts, levels of total protein and LDH activity BAL fluid from rats subacutely exposed to Aroclor 1242 vapor. Values are expressed as mean  $\pm$  SE. None of these outcomes measures was significantly different between sham and exposed rats.

| Exposure Group | Total Cells ( $10^3$ per mL BAL) | Differential Cells ( $10^3$ per mL BAL) |                 |                 | Total protein ( $\mu\text{g/mL}$ ) | LDH activity (U/L) |
|----------------|----------------------------------|-----------------------------------------|-----------------|-----------------|------------------------------------|--------------------|
|                |                                  | Macrophages                             | Neutrophils     | Lymphocytes     |                                    |                    |
| PCB            | 45.54 $\pm$ 7.31                 | 44.92 $\pm$ 7.19                        | 0.40 $\pm$ 0.20 | 0.21 $\pm$ 0.09 | 66.6 $\pm$ 5.2                     | 66 $\pm$ 6         |
| Sham           | 42.61 $\pm$ 6.31                 | 41.71 $\pm$ 6.33                        | 0.24 $\pm$ 0.07 | 0.63 $\pm$ 0.20 | 70.6 $\pm$ 5.5                     | 62 $\pm$ 7         |

**Table S6.** Concentration [pg/mL (mean  $\pm$  SE)] of cytokines in BAL fluid from rats subacutely exposed to Aroclor 1242 vapor. Values are expressed as mean  $\pm$  SE. LLOD = lower limit of detection. None of these outcomes measures was significantly different between sham and exposed rats.

|      | GM-CSF     | IFN- $\gamma$ | IL-1 $\alpha$ | IL-1 $\beta$ | IL-2         | IL-4       | IL-6       | IL-10       | IL-12      | TNF- $\alpha$ |
|------|------------|---------------|---------------|--------------|--------------|------------|------------|-------------|------------|---------------|
| PCB  | 1.61 $\pm$ | 1.30 $\pm$    | 9.93 $\pm$    | 5.53 $\pm$   | 101.55 $\pm$ | 8.40 $\pm$ | 2.72 $\pm$ | 75.83 $\pm$ | 2.90 $\pm$ | 0.35 $\pm$    |
|      | 0.00       | 0.08          | 0.00          | 0.96         | 26.36        | 0.28       | 0.00       | 0.00        | 0.00       | 0.00          |
| Sham | 1.61 $\pm$ | 1.38 $\pm$    | 9.93 $\pm$    | 4.26 $\pm$   | 80.20 $\pm$  | 8.93 $\pm$ | 2.67 $\pm$ | 86.48 $\pm$ | 2.50 $\pm$ | 0.35 $\pm$    |
|      | 0.00       | 0.00          | 0.00          | 0.59         | 21.39        | 0.23       | 0.03       | 10.65       | 0.25       | 0.00          |
| LLOD | 1.61       | 1.38          | 9.93          | 5.36         | 36.10        | 11.31      | 2.72       | 75.83       | 2.90       | 0.35          |

**Table S7.** Biological half lives of detected congeners in rat liver, lung, blood, adipose tissue and brain after acutely exposed to PCB vaor mixture from Aroclor 1242. Values are expressed in hr. Negative values are presented as indications that the material was accumulating instead of being eliminated.

| PCB Congener No. |               | Liver  | Lung   | Blood  | Adipose  | Brain   |
|------------------|---------------|--------|--------|--------|----------|---------|
| di               | 6             | 1.75   | 5.00   | 3.96   | 64.06    | 1.35    |
|                  | 8             | 3.61   | 5.56   | 9.47   | 37.08    | 1.61    |
|                  | 15            | 3.07   | 6.36   | 5.52   | -18.04   | 2.28    |
| tri              | 16            | 2.51   | 9.01   | 19.32  | 26.59    | 20.71   |
|                  | 17            | 5.48   | 8.30   | 18.14  | -3396.16 | 2.00    |
|                  | 18*/30        | 4.35   | 6.28   | 12.37  | 29.88    | 10.84   |
|                  | 20/28*        | 7.34   | 9.34   | 11.53  | -20.84   | 9.18    |
|                  | 21/33*        | 3.01   | 3.54   | 8.41   | 16.52    | 3.19    |
|                  | 22            | 1.03   | 1.71   | 22.96  | 9.23     | 1.37    |
|                  | 24            | 2.05   | 9.41   | 3.58   | -13.29   | -5.90   |
|                  | 25            | 2.41   | 1.79   | 2.15   | 14.69    | --      |
|                  | 26*/29        | 4.07   | 5.18   | 3.79   | 63.09    | 1.97    |
|                  | 31            | 4.00   | 4.46   | 8.40   | 23.05    | 3.19    |
|                  | 32            | 4.18   | 4.24   | 22.47  | 838.19   | 3.68    |
|                  | 37            | 4.83   | 2.83   | 2.81   | -26.48   | 4.53    |
| tetra            | 49*/69        | 24.83  | 28.00  | -33.65 | -15.73   | 17.75   |
|                  | 52            | 6.21   | 7.53   | 16.33  | -31.23   | 46.00   |
|                  | 59            | 2.92   | 2.07   | 7.36   | 82.93    | 35.23   |
|                  | 60            | 8.34   | 9.00   | 9.63   | -6.62    | 12.37   |
|                  | 61/70*/74*/76 | 4.17   | -12.70 | 11.48  | -17.87   | 6.89    |
|                  | 64            | 4.30   | 9.39   | 9.49   | -115.71  | 2.96    |
|                  | 66            | 6.18   | 12.93  | 13.56  | -12.01   | 4.24    |
|                  | 77            | 5.76   | 12.93  | 3.33   | 6.44     | 1.83    |
| penta            | 83            | 24.53  | 22.95  | 11.41  | -9.18    | -5.63   |
|                  | 99            | 15.01  | 55.99  | 22.50  | -9.36    | -11.29  |
|                  | 105           | 4.82   | 4.06   | 5.17   | -13.75   | -179.83 |
|                  | 112           | -95.46 | 83.65  | 29.44  | -6.66    | -7.10   |
|                  | 118           | 3.93   | 28.98  | 12.15  | -11.18   | 3.90    |

\*Major congeners of the coeluting congener set in Aroclor 1242.

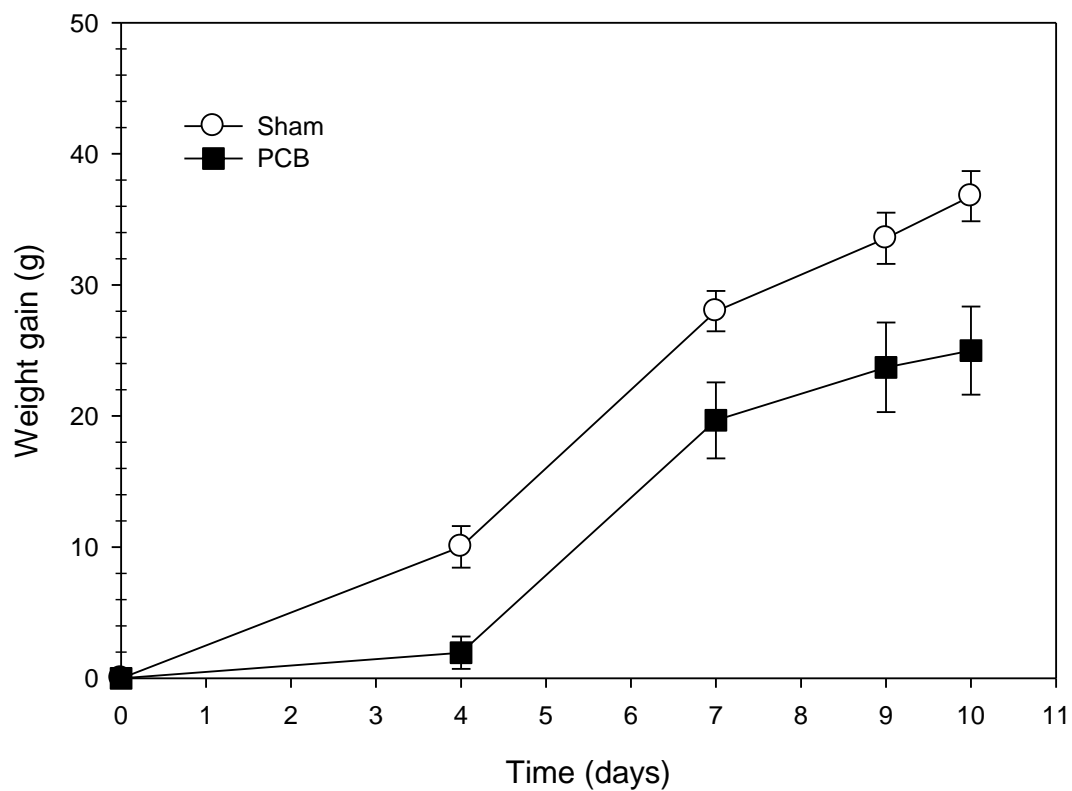

**Figure S1.** Effect of PCBs on body weight gain in rats during 10 d subacute inhalation exposure to Aroclor 1242 vapor. Repeated-measures analysis of variance (ANOVA) showed a significantly diminished weight gain in PCB-exposed rats ( $p = 0.006$ ).



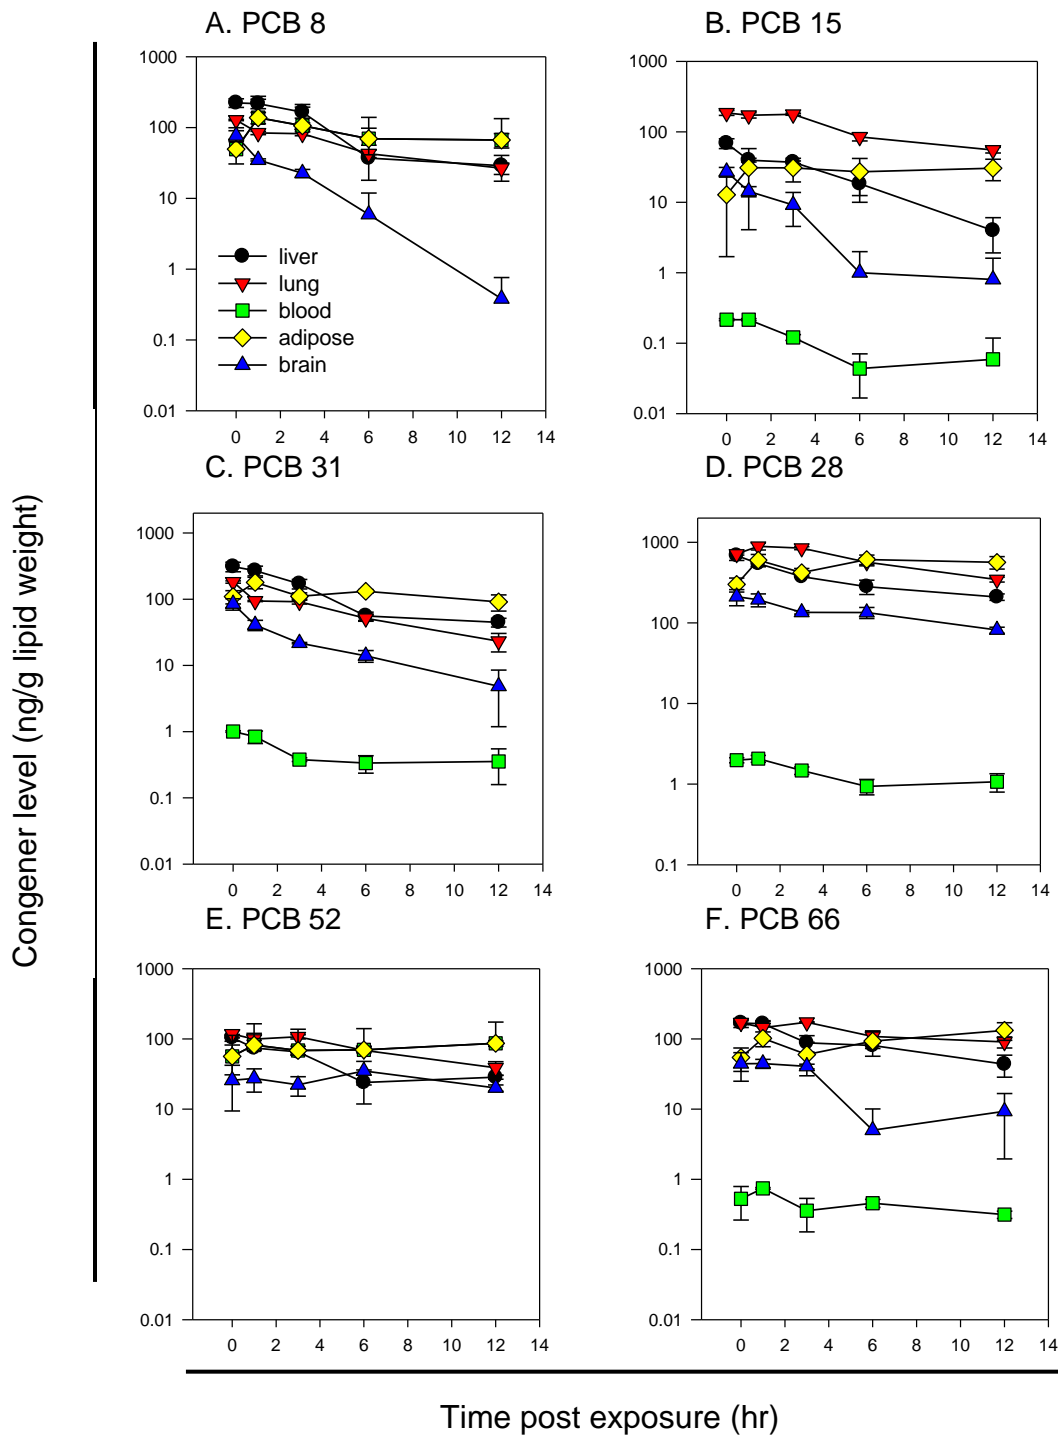

**Figure S2** Time course of concentration change in liver, lung, blood, adipose tissue and brain for PCB 8 (A), PCB 15 (B), PCB 31 (C), PCB 20+28 (D), PCB 52 (E) and PCB 66 (F) after nose-only inhalation. Graphs were arranged according to chlorine numbers: A-B, di-chlorinated; C-D, tri-chlorinated; E-F, tetra-chlorinated. The six congeners were selected to reflect the impact of structural dissimilarity on the time course.

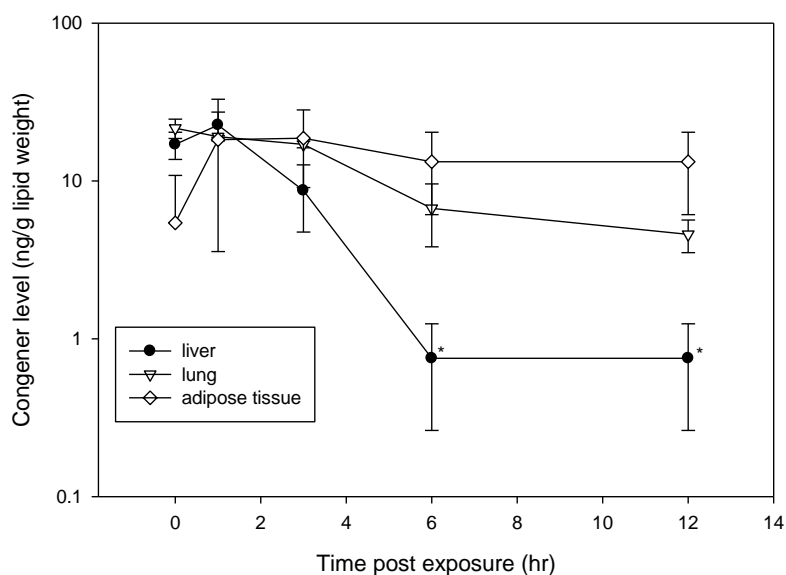

**Figure S3.** Time course of concentration change in liver, lung and adipose tissue for PCB 6 after nose-only inhalation. \* The average level of the samples was below the method detection limit of the respective congener.

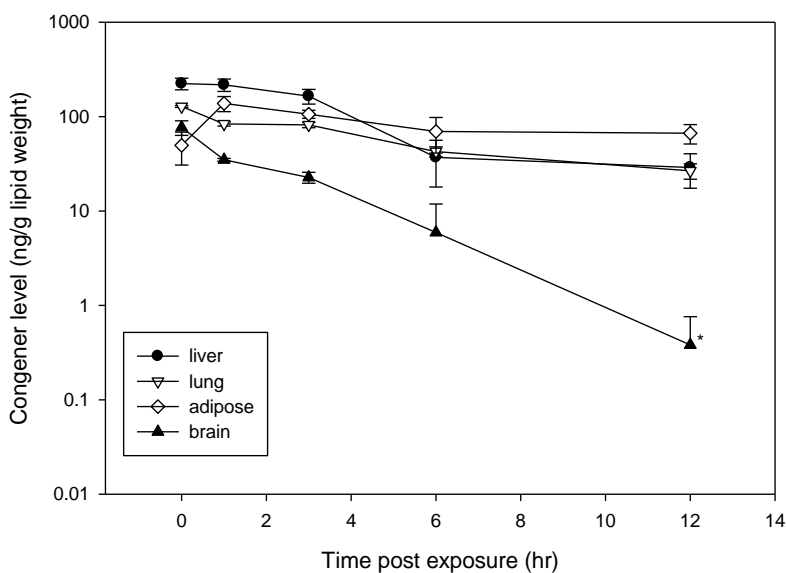

**Figure S4.** Time course of concentration change in liver, lung, adipose tissue and brain for PCB 8 after nose-only inhalation. \* The average level of the samples was below the method detection limit of the respective congener.

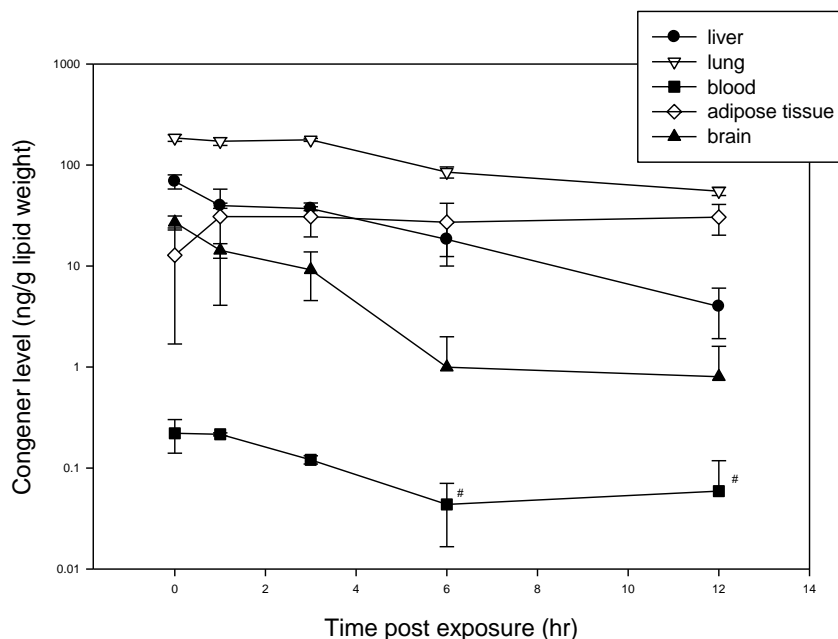

**Figure S5.** Time course of concentration change in liver, lung, blood, adipose tissue and brain for PCB 15 after nose-only inhalation. <sup>#</sup>Average congener level of treatment group is less than twice of that in blood samples of sham/sentinels.

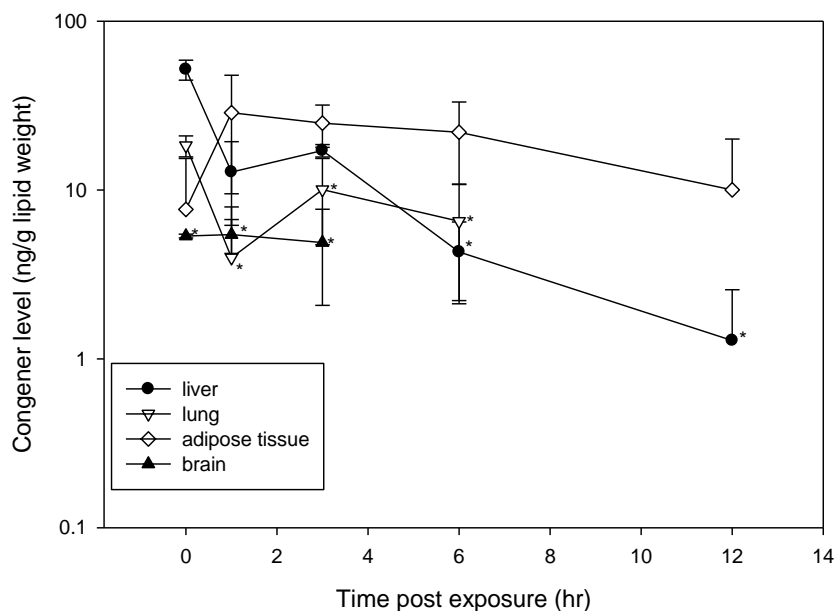

**Figure S6.** Time course of concentration change in liver, lung, adipose tissue and brain for PCB 16 after nose-only inhalation. \*The average level of the samples was below the method detection limit of the respective congener.

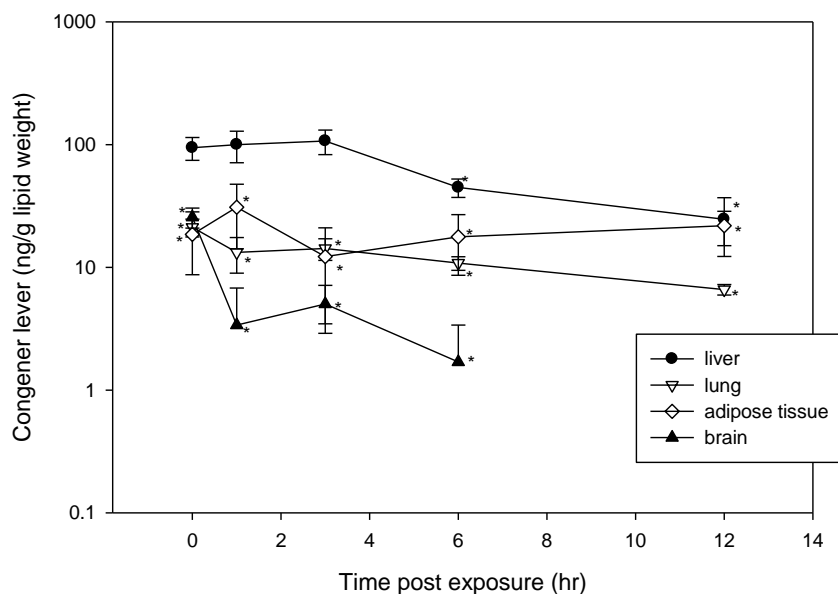

**Figure S7.** Time course of concentration change in liver, lung, adipose tissue and brain for PCB 17 after nose-only inhalation. \*The average level of the samples was below the method detection limit of the respective congener.

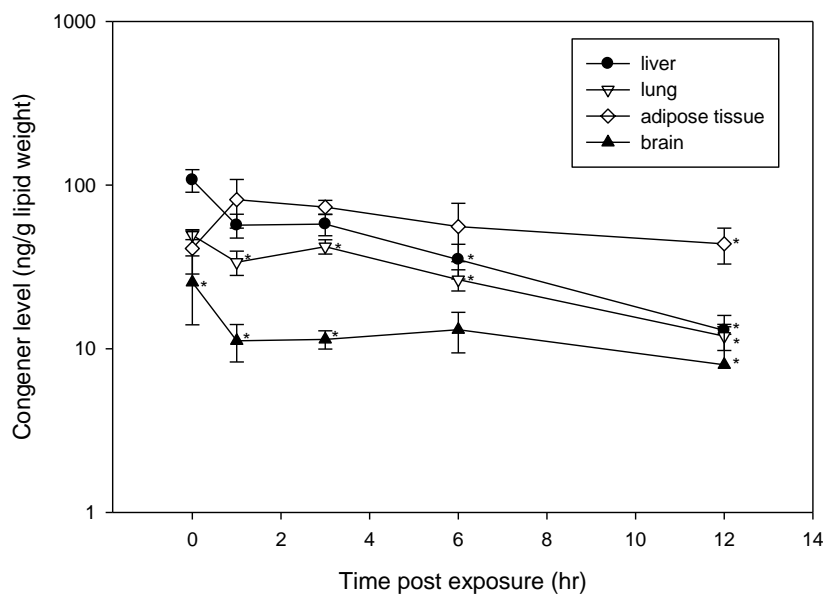

**Figure S8.** Time course of concentration change in liver, lung, adipose tissue and brain for PCB 18+30 after nose-only inhalation. \*The average level of the samples was below the method detection limit of the respective congener.

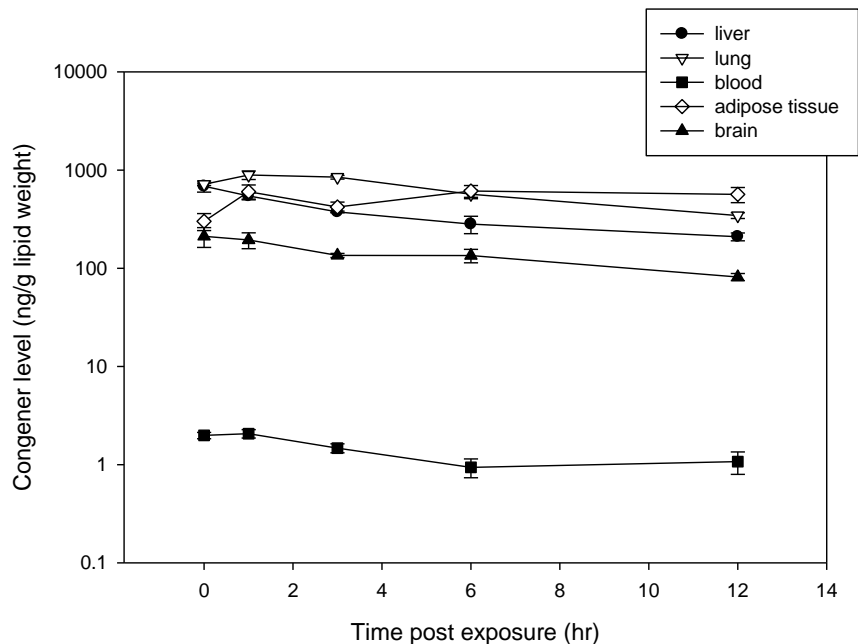

**Figure S9.** Time course of concentration change in liver, lung, adipose tissue and brain for PCB 20+28 after nose-only inhalation.

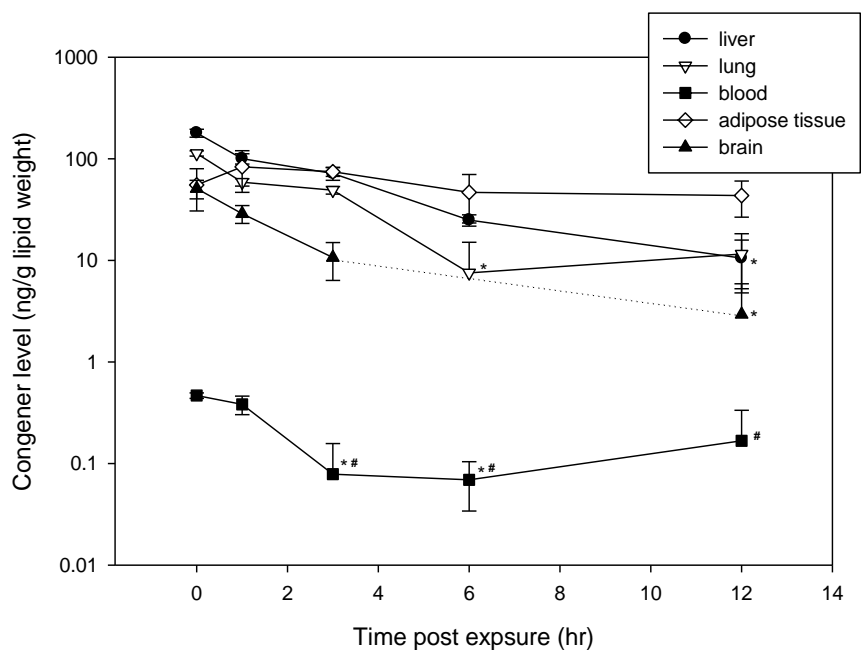

**Figure S10.** Time course of concentration change in liver, lung, blood, adipose tissue and brain for PCB 21+33 after nose-only inhalation. \*The average level of the samples was below the method detection limit of the respective congener. #Average congener level of treatment group is less than twice of that in blood samples of sham/sentinels.

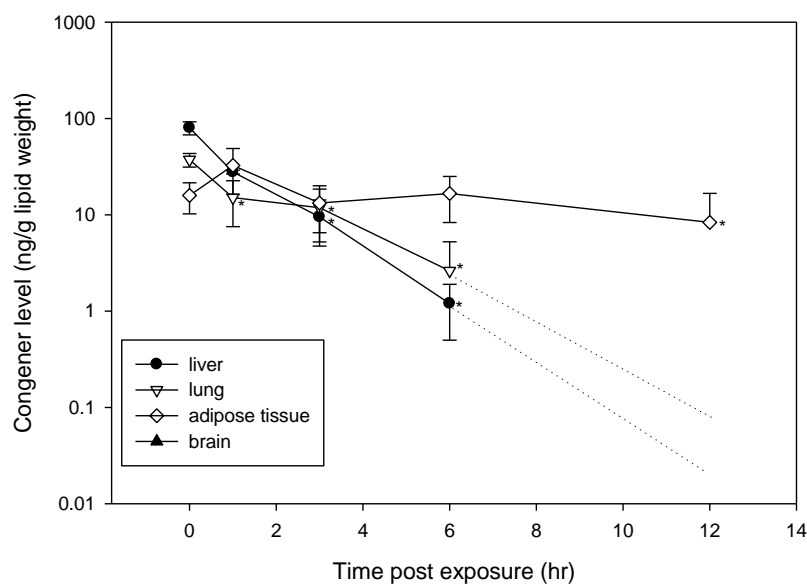

**Figure S11.** Time course of concentration change in liver, lung and adipose tissue for PCB 22 after nose-only inhalation. Dotted lines represent the possible trend of decreasing when the concentrations are no longer detectable at 12 hr post exposure. \* The average level of the samples was below the method detection limit of the respective congener.

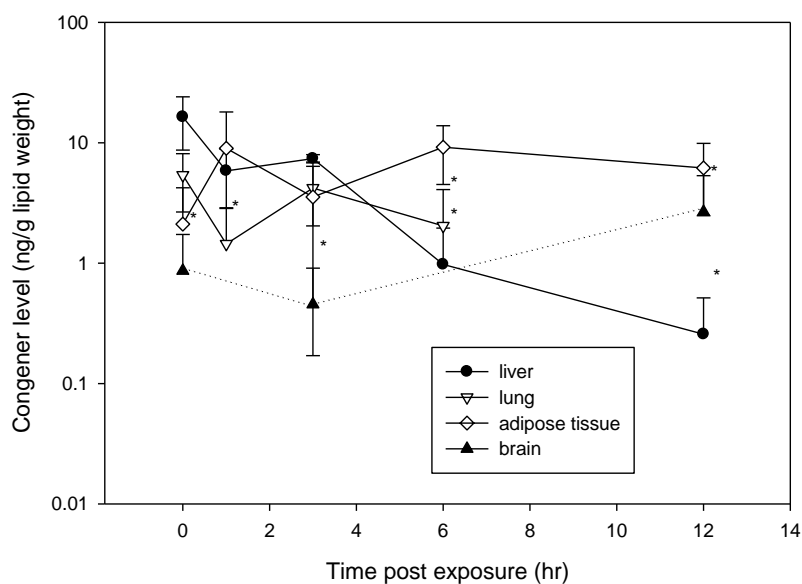

**Figure S12.** Time course of concentration change in liver, lung, adipose tissue and brain for PCB 24 after nose-only inhalation. \* The average level of the samples was below the method detection limit of the respective congener.

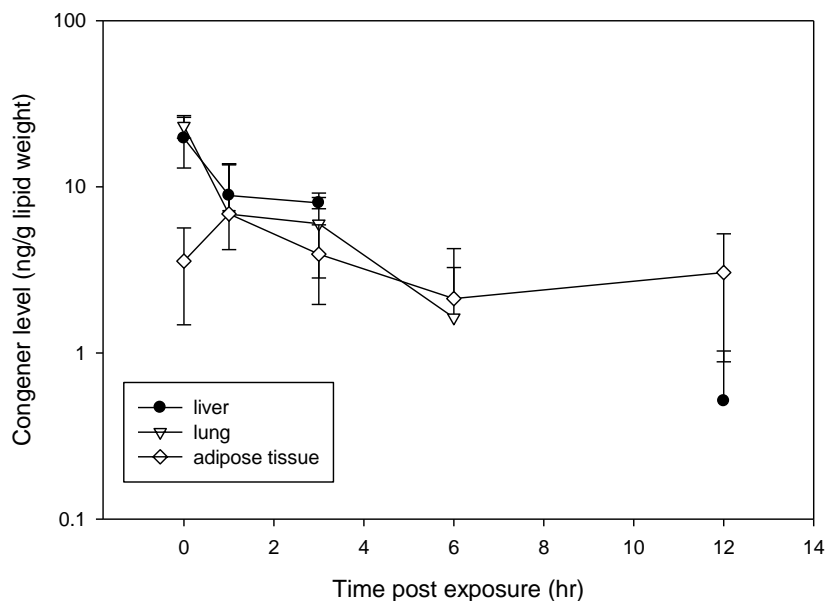

**Figure S13.** Time course of concentration change in liver, lung, and adipose tissue for PCB 25 after nose-only inhalation.

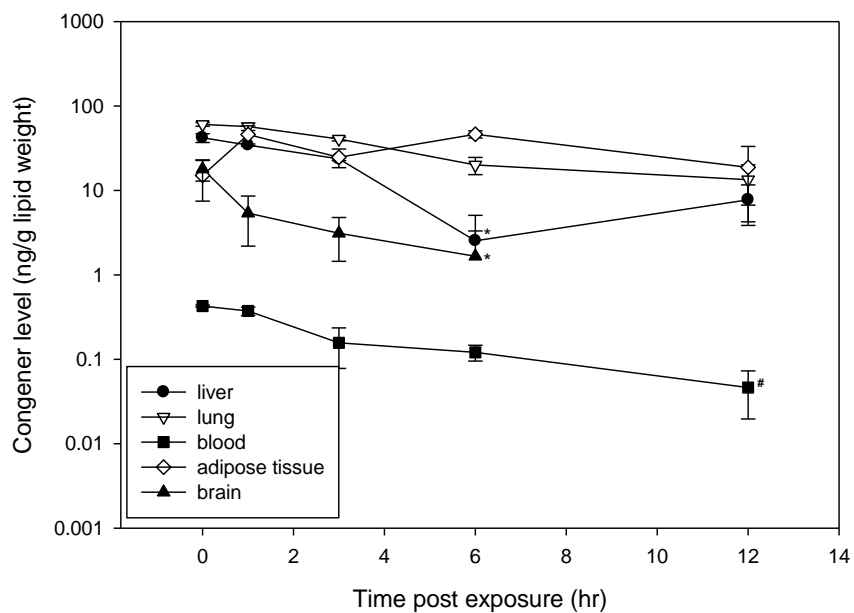

**Figure S14.** Time course of concentration change in liver, lung, blood, adipose tissue and brain for PCB 26+29 after nose-only inhalation. \* The average level of the samples was below the method detection limit of the respective congener. # Average congener level of treatment group is less than twice of that in blood samples of sham/sentinels.

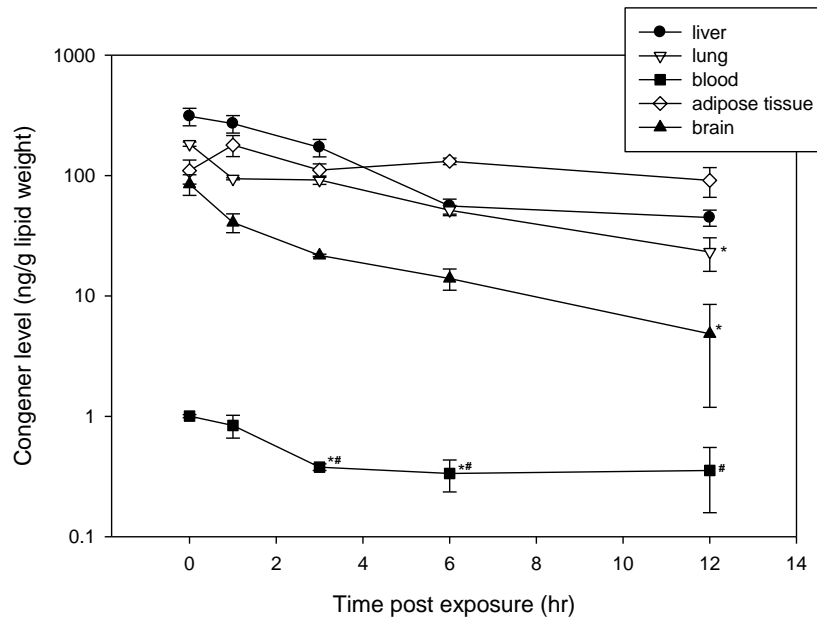

**Figure S15.** Time course of concentration change in liver, lung, blood, adipose tissue and brain for PCB 31 after nose-only inhalation. \* The average level of the samples was below the method detection limit of the respective congener. # Average congener level of treatment group was below 2 fold of that in blood samples of sham/sentinels.

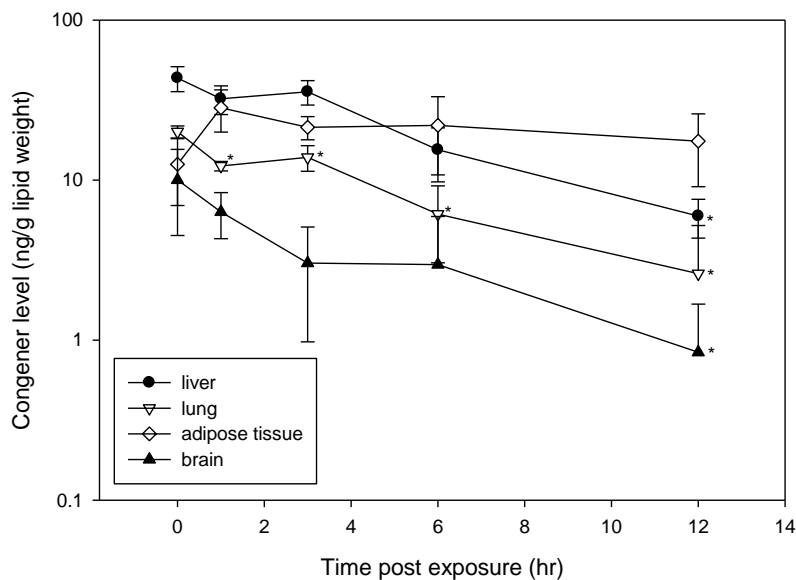

**Figure S16.** Time course of concentration change in liver, lung, adipose tissue and brain for PCB 32 after nose-only inhalation. \* The average level of the samples was below the method detection limit of the respective congener.



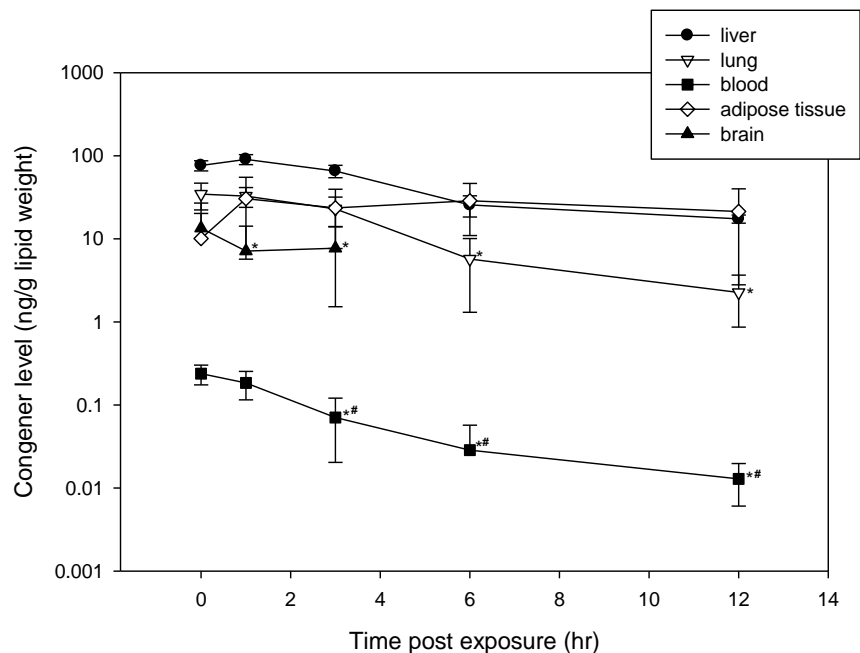

**Figure S17.** Time course of concentration change in liver, lung, blood, adipose tissue and brain for PCB 37 after nose-only inhalation. \* The average level of the samples was below the method detection limit of the respective congener.

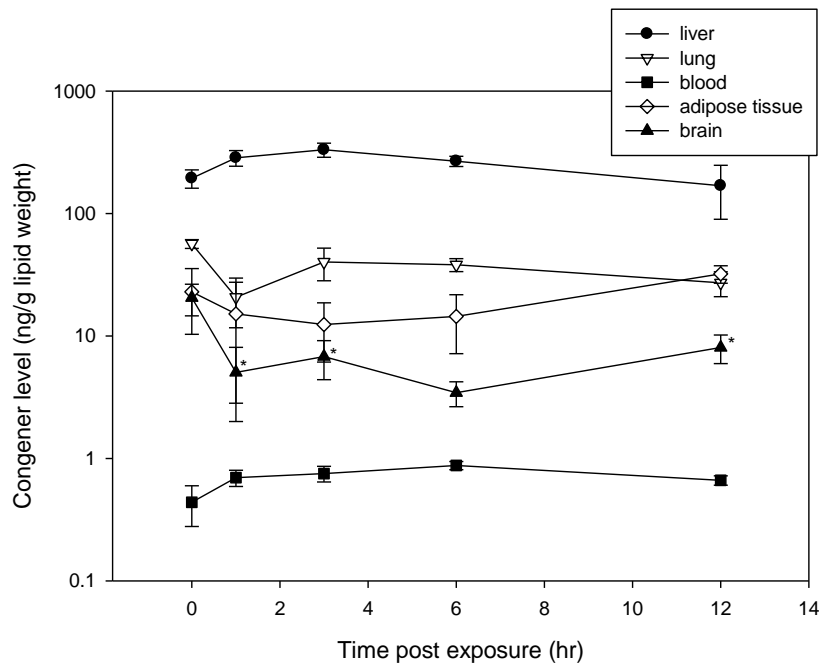

**Figure S18.** Time course of concentration change in liver, lung, blood, adipose tissue and brain for PCB 49+69 after nose-only inhalation. \* The average level of the samples was below the method detection limit of the respective congener.

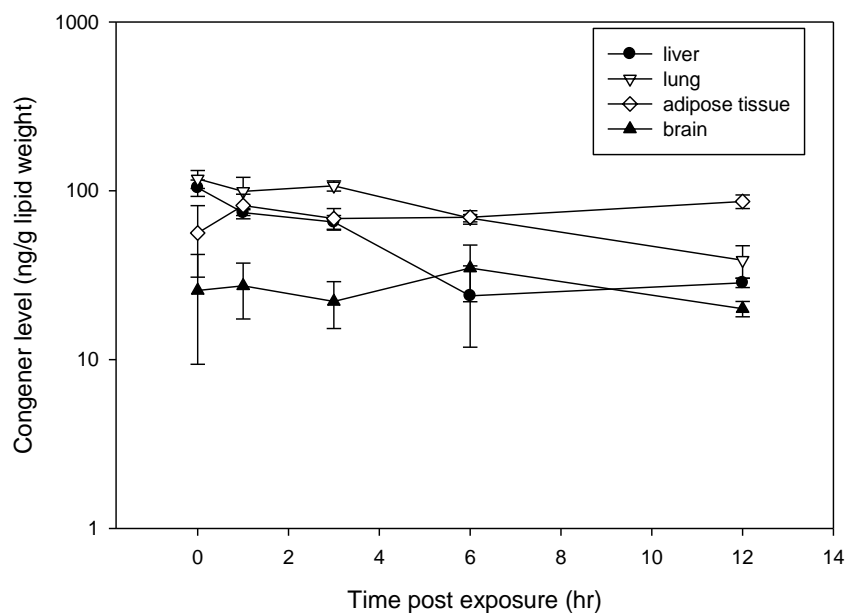

**Figure S19.** Time course of concentration change in liver, lung, adipose tissue and brain for PCB 52 after nose-only inhalation.

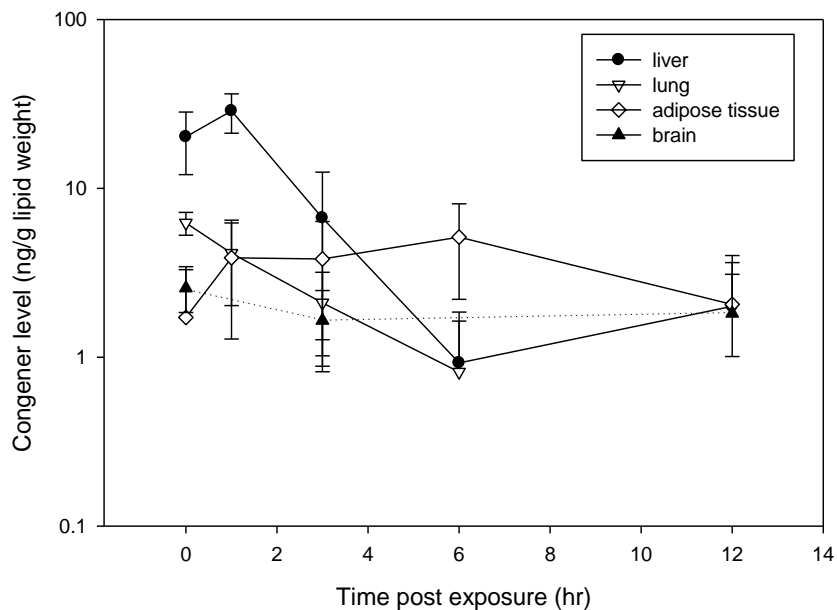

**Figure S20.** Time course of concentration change in liver, lung, adipose tissue and brain for PCB 59 after nose-only inhalation.

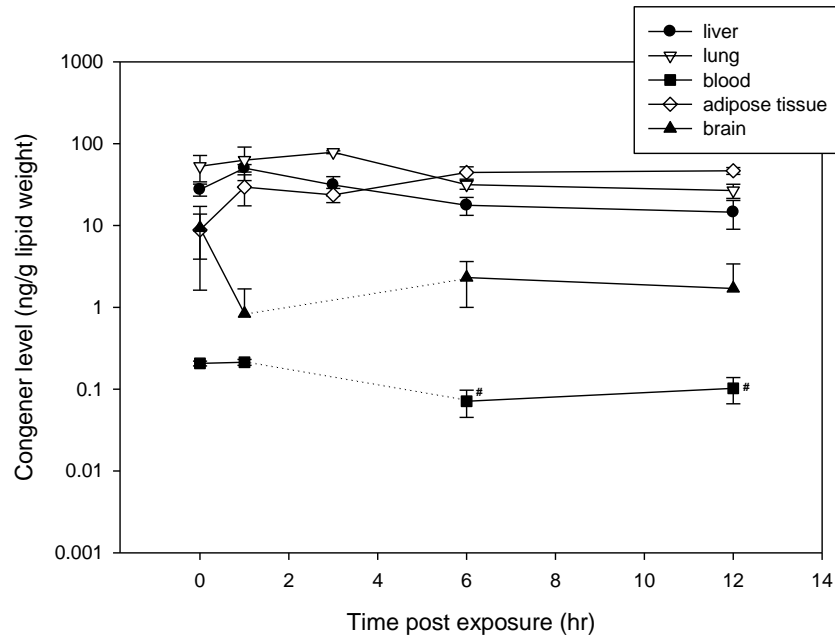

**Figure S21.** Time course of concentration change in liver, lung, blood, adipose tissue and brain for PCB 60 after nose-only inhalation. Dotted lines represent the possible trend of change when the concentrations are not detectable at 3 hr post exposure. # Average congener level of treatment group is less than twice of that in blood samples of sham/sentinels.

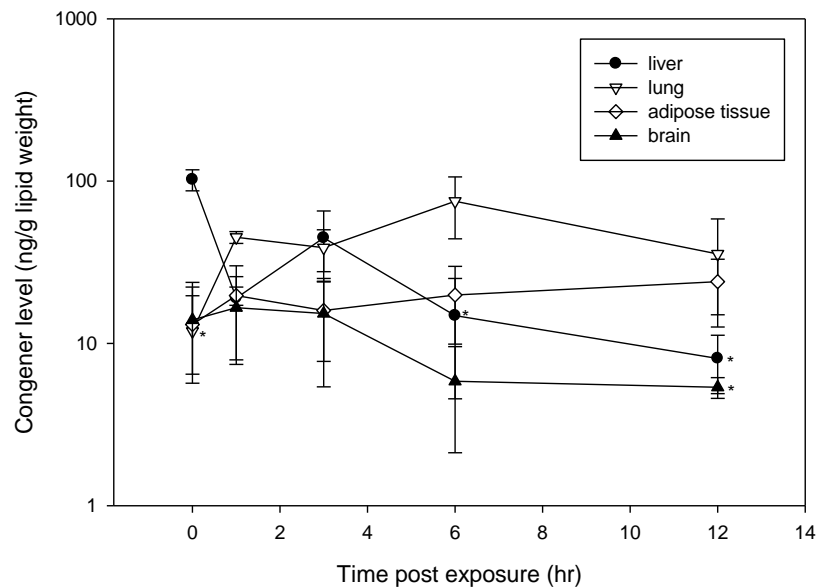

**Figure S22.** Time course of concentration change in liver, lung, adipose tissue and brain for PCB 61+70+74+76 after nose-only inhalation. \*The average level of the samples was below the method detection limit of the respective congener.

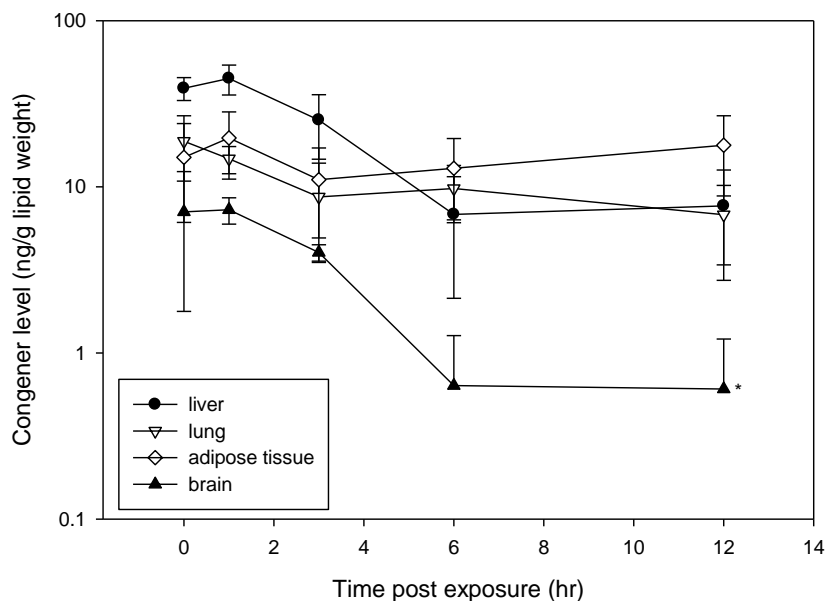

**Figure S23.** Time course of concentration change in liver, lung, adipose tissue and brain for PCB 64 after nose-only inhalation. \*The average level of the samples was below the method detection limit of the respective congener.

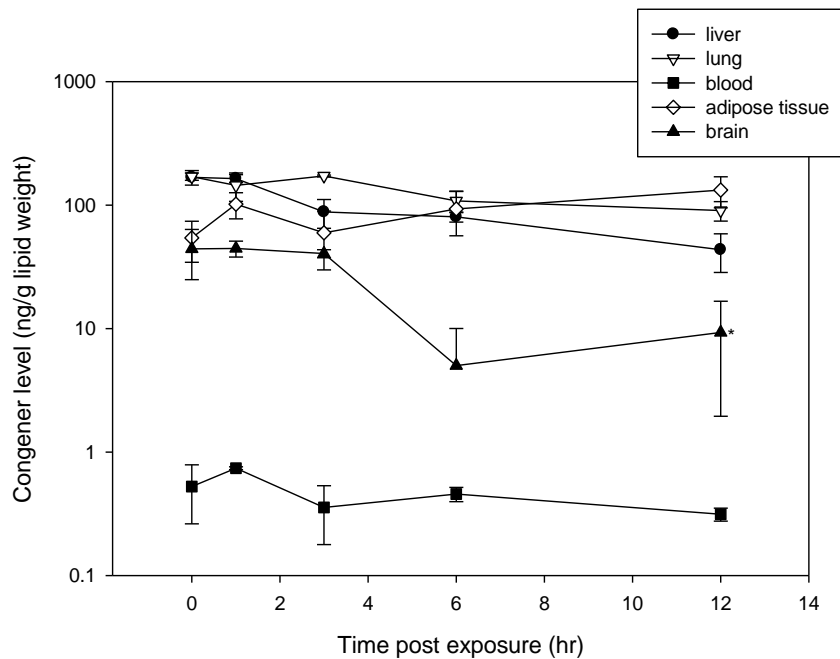

**Figure S24.** Time course of concentration change in liver, lung, blood, adipose tissue and brain for PCB 66 after nose-only inhalation. \*The average level of the samples was below the method detection limit of the respective congener.

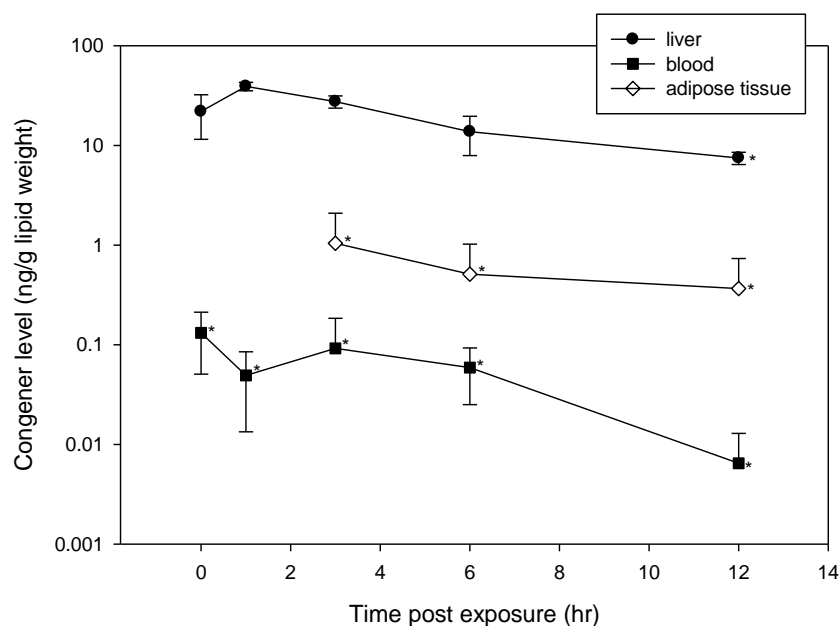

**Figure S25.** Time course of concentration change in liver, lung and adipose tissue for PCB 77 after nose-only inhalation. \*The average level of the samples was below the method detection limit of the respective congener.

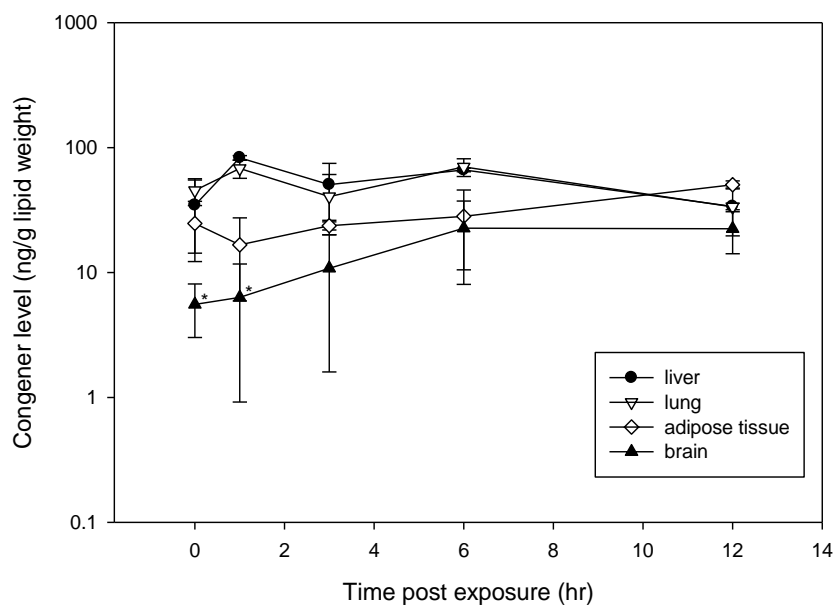

**Figure S26.** Time course of concentration change in liver, lung, adipose tissue and brain for PCB 83 after nose-only inhalation. \*The average level of the samples was below the method detection limit of the respective congener.

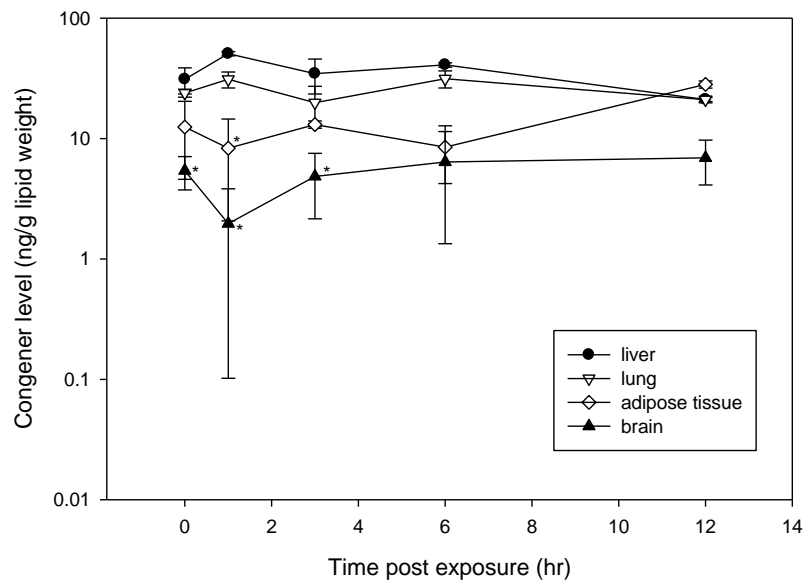

**Figure S27.** Time course of concentration change in liver, lung, adipose tissue and brain for PCB 99 after nose-only inhalation. \*The average level of the samples was below the method detection limit of the respective congener.

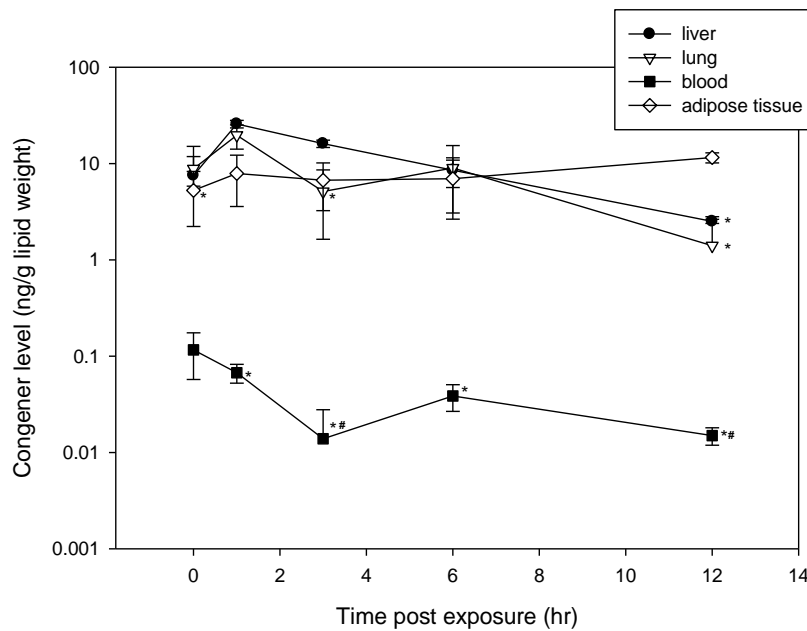

**Figure S28.** Time course of concentration change in liver, lung, blood and adipose tissue for PCB 105 after nose-only inhalation. \*The average level of the samples was below the method detection limit of the respective congener. # Average congener level of treatment group is less than twice of that in blood samples of sham/sentinels.

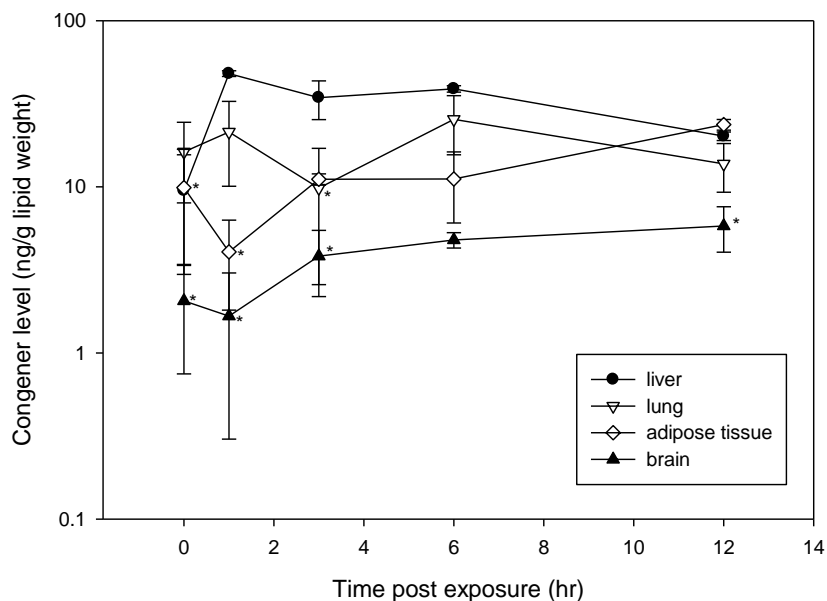

**Figure S29.** Time course of concentration change in liver, lung, blood, adipose tissue and brain for PCB 112 after nose-only inhalation. \*The average level of the samples was below the method detection limit of the respective congener.

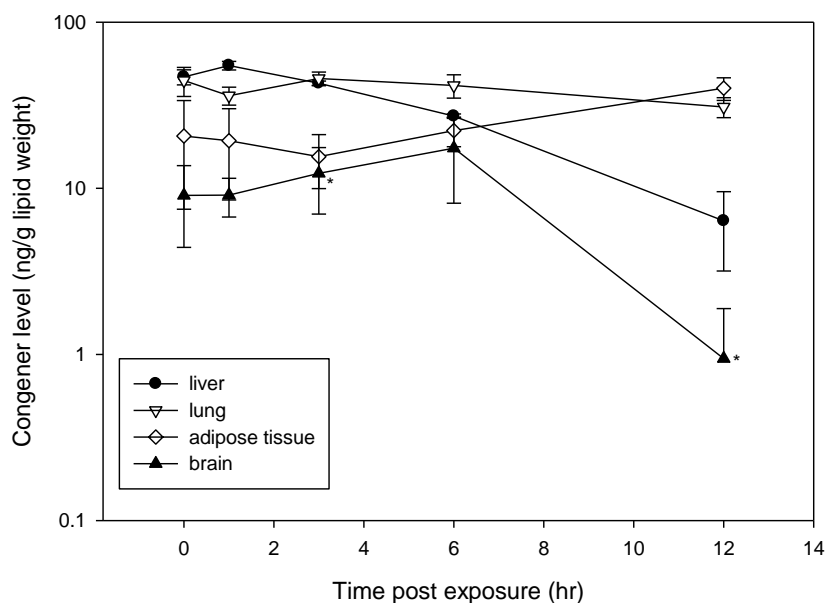

**Figure S30.** Time course of concentration change in liver, lung, adipose tissue and brain for PCB 118 after nose-only inhalation. \*The average level of the samples was below the method detection limit of the respective congener.

## Literature Cited

1. U.S. Environmental Protection Agency. *Method 1668, Revision A: Chlorinated Biphenyl Congeners in Water, Soil, Sediment, and Tissue* by HRGC/HRMS; EPA-821-R-00-002; EPA: Washington, DC, 1999.
2. Kania-Korwel, I.; Zhao, H.; Norstrom, K.; Li, X.; Hornbuckle, K.C.; Lehmler, H.J. Simultaneous extraction and clean-up of polychlorinated biphenyls and their metabolites from small tissue samples using pressurized liquid extraction. *J. Chromatogr. A* **2008**, *1214*, 37-46.
3. Kania-Korwel, I.; Shaikh, N.S.; Hornbuckle, K.C.; Robertson, L.W.; Lehmler, H.-. Enantioselective disposition of PCB 136 (2,2',3,3',6'6'-hexachlorobiphenyl) in C57BL/6 mice after oral and intraperitoneal administration. *Chirality* **2007**, *19*, 56-66.
4. Martinez, A.; Norstrom, K.; Wang, K.; Hornbuckle, K.C. Polychlorinated biphenyls in the surficial sediment of Indiana Harbor and Ship Canal, Lake Michigan. *Environ. Int.* **2009**, DOI:10.1016/j.envint.2009.01.015.
5. Falconer, R.L. and Bidleman, T.F. Vapor pressures and predicted particle/gas distributions of polychlorinated biphenyl congeners as functions of temperature and ortho-chlorine substitution. *Atmos. Environ.* **1994**, *28*, 547-554.
6. Li, N.; Wania, F.; Lei, Y.D.; Daly, G.L. A Comprehensive and Critical Compilation, Evaluation, and Selection of Physical-Chemical Property Data for Selected Polychlorinated Biphenyls. *J. Phys. Chem. Ref. Data* **2003**, *32*, 1545-1590.
